# Supplementary material
Source: PubMed Central journal article supplement (PMC7810023)
Supplement: NIHMS1630902-supplement-5.pdf [file NIHMS1630902-supplement-5.pdf]

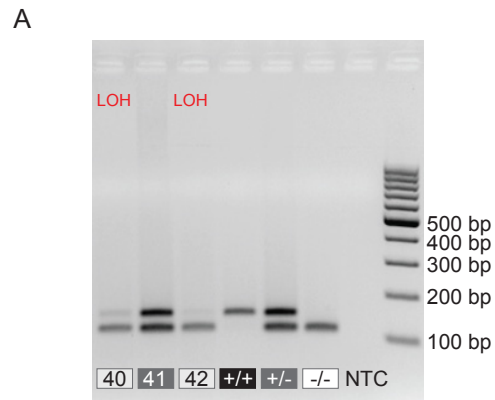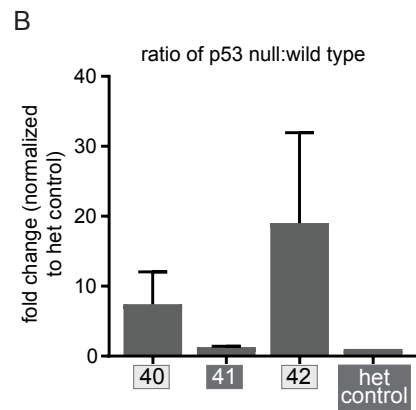

**Supplementary Figure S4: Detection of LOH in tumors from p53<sup>+/-</sup> animals.** (A) PCR based tumor genotyping. Samples 40 and 42 exhibit LOH while sample 41 does not. (B) qPCR based tumor genotyping for samples depicted in A. The average fold change of the amplification of the null allele to the wild type allele is shown. Larger values indicate a higher percentage of cells with p53 LOH.
